# Supplementary material for: Reliability of isometric and isokinetic trunk flexor strength using a functional electromechanical dynamometer
Source: PeerJ. 2019 Oct 18;7:e7883. doi: 10.7717/peerj.7883 (PMC6827544; doi:10.7717/peerj.7883)
Supplement: Supplemental Information 1 [file peerj-07-7883-s001.xlsx]

## Sheet: TEST
										V 0,15m/s R 0,25%																	V 0,30m/s R 0,25%																V 0,45m/s R 0,25%
	Descriptives Characteristic									Fpeak Rep1		Fpeak Rep2		Fpeak Rep3		Fpeak Rep4		FMean Rep1		FMean Rep2		FMean Rep3		FMean Rep4			Fpeak Rep1		Fpeak Rep2		Fpeak Rep3		Fpeak Rep4		FMean Rep1		FMean Rep2		FMean Rep3		FMean Rep4		Fpeak Rep1		Fpeak Rep2		Fpeak Rep3		Fpeak Rep4
SUBJECT	AGE	WEIGHT	HEIGHT	BMI	OLBPD	SPADI	ROM_100%	ROM_25%	ROM_50%	Con	Exx	Con	Exx	Con	Exx	Con	Exx	Con	Exx	Con	Exx	Con	Exx	Con	Exx		Con	Exx	Con	Exx	Con	Exx	Con	Exx	Con	Exx	Con	Exx	Con	Exx	Con	Exx	Con	Exx	Con	Exx	Con	Exx	Con
S01	21	60.5	1.613	23.2534	0	0	50	12.5	25	31.5	43.4	28.8	43	28.2	40.5	29.2	37.5	15.8	39.3	21	38.2	20.8	33.3	20.3	33.1		27.9	47.6	37.1	56.2	35.1	47.1	37.1	46.6	10.6	38.3	17.7	33.4	22.5	34.8	22.1	36.4	37.1	73.3	34.4	60.6	39.7	59.4	36.5
S02	19	75.2	1.735	24.9815	0	2	53	13.25	26.5	31.2	58.8	43	47.1	41.1	61.7	41	59.3	18.2	51.5	28.6	37.8	29.6	51.7	28.8	50.9		34.1	66.1	38.7	64.6	42.5	65.1	44.7	64.2	9.9	54	27.7	56.7	29.5	55.5	28.7	49.4	55.6	76.5	41.7	67.4	54.2	79.2	44.2
S03	20	66	1.68	23.3844	0	0	51.6	12.9	25.8	32.4	48	33.8	43.5	38	50.1	38.7	50	11.5	40.2	26.2	38.2	25.1	37.6	21.5	36.7		33.7	51.4	37.9	55.3	32.1	54.5	43	60.2	11.8	39.6	24.7	40	22.3	40	25.5	38.5	29.3	64.7	44.7	75.3	49.3	78.2	51.6
S04	21	63.4	1.794	19.699	4	4	51.8	12.95	25.9	43.3	58.2	46	61.1	39.5	56.9	44.4	56.9	25.6	54.8	28.7	54.6	27.4	52.4	27.3	49		39.2	69.3	46.8	70.4	40	65.5	44.5	63.5	24.1	55.4	28.1	56.9	27	55.7	26.9	54.2	39.2	66.7	38.3	69.9	50.1	74	52.3
S05	22	73	1.716	24.7907	0	0	48	12	24	37.7	56.3	35.7	60.4	33.4	59.4	33.5	56.6	19.7	47.6	25.3	52.6	24.9	52.4	22.3	48.4		24.6	59.4	27.5	57.7	28.2	56.4	28.6	55.1	8.2	46.2	19.6	47.9	19.8	44.5	18.5	42.6	31.3	63.6	34.4	61.5	32.3	62.4	33.4
S06	22	71.1	1.701	24.5732	2	5	52.2	13.05	26.1	38.6	59.8	51.8	62.8	44.4	55.9	45.4	56.3	21.6	36.3	35.5	48.4	33.7	49.2	32.8	43.2		41.7	67.4	53.9	73.8	49.4	66	42.4	58.3	11.5	52.4	32.3	56.4	32.3	53.9	32.6	44.1	51.9	77.1	31.1	72.4	38.9	64	42.9
S07	21	66.1	1.761	21.3149	6	10	50.9	12.725	25.45	36.5	51.6	40.4	48.2	30.3	43.8	30.4	46.2	18.4	46.7	23.4	39.9	21.7	39.2	22.6	37		37.3	61	30.1	53.5	28.3	48	29.8	46.6	18.3	49.2	19	46.1	18.5	40.4	17.8	39.7	26.2	58.3	32.1	65.5	31.5	60.2	29
S08	21	70.3	1.716	23.8738	0	0	50	12.5	25	44.4	57	42	52.6	41.9	50.4	34.1	53.4	29.8	51.9	29.6	46.6	29.1	44.6	28.1	36.2		40.3	62	40.4	57.8	39.2	60.1	43.7	61.5	24.7	51.4	27.1	48.6	27.9	46.9	27.6	39.1	34	70.3	50.9	78.5	46.1	76.2	51
S09	23	81	1.8	25	0	0	59.4	14.85	29.7	45.3	67.9	39.9	65.5	42.7	61.8	44.6	66	27.1	60.1	32.7	58.4	31.4	55.9	30.1	56.7		41.7	65.3	40.4	66.9	43.1	69.9	42.1	65.9	19.7	57.3	30.7	58	31.6	60.8	30.6	56.6	33.8	67.2	46.9	77	44.6	75.8	41.5
S10	23	63.5	1.775	20.1547	0	0	50.8	12.7	25.4	32.1	59.9	43.7	59.8	44.1	62.3	42.3	60.7	17.6	53.6	29.8	55.8	30.8	57.7	30.1	53.7		33.1	63.4	49.4	68.2	39.4	64.5	35.2	61.8	13	55.3	29	57.7	28.1	55.9	27.7	51.7	28.2	61.7	38.2	75.8	42.3	63.1	39.8
S11	20	76.2	1.777	24.1313	0	0	56.2	14.05	28.1	18.4	47.4	37.4	52.1	36.8	51.8	42.2	53.3	9.5	39.4	24.6	42.4	24.9	43.3	25.7	47.5		30.1	53.8	35.6	58.5	40.7	60.6	33.5	61.9	12	44.4	20.9	37	22	39.2	23.1	40.4	33.1	65.4	30.4	62	30.4	59.2	32.1
S12	19	65.9	1.66	23.9149	14	6	52.4	13.1	26.2	49.2	65.7	47.3	64.2	48.3	60.3	43.9	52	29.6	55.5	30.6	45.2	32.8	38.1	29	33.2		37.5	71	49.9	71.8	41.2	69.1	44.7	62.2	23.3	54	30.3	60.4	31.8	56.5	30.1	47.4	46.5	82.3	49.3	76	36.1	59.9	42.3
S13	24	59.8	1.637	22.3154	2	0	48.7	12.175	24.35	31.4	52.9	44.9	52.8	36.6	51.7	42.4	51.4	21.1	50.2	28.2	49.1	26.6	48.4	24.6	46.1		33	60.6	42.8	67.4	47	64.3	35.3	62.7	16.7	48.4	28.6	53	27.1	49.5	25.8	48.7	43.4	76.6	40.7	75.4	38.6	72.8	37.1
S14	24	59.1	1.741	19.498	4	1	47	11.75	23.5	23.5	50.4	40.3	53.8	39.1	49.6	35.6	44.5	13.5	20.5	21.5	31.8	25.5	39.5	24.5	34.1		32.1	53.4	34.8	58.1	42.5	54.6	38.9	55.3	10	37.1	25.7	42.1	25.8	33.4	24.5	39.1	30.2	62.5	36.8	60.7	32.9	59.6	32.6
S15	22	79.2	1.785	24.857	0	0	52.2	13.05	26.1	38.3	61.1	44.3	70.8	45.5	61.9	39	60.5	18.8	54.5	28.5	55	29.9	56.9	29.1	52.8		27.3	60.1	43.8	65.3	37.5	65.5	44.6	67	9.9	49.5	25	53	28.5	56.3	30.3	56.4	46.4	75.6	55.1	82.6	56.1	83.1	49.9
S16	20	60.3	1.64	22.4197	2	0	48.5	12.125	24.25	26.8	44.8	37.2	48.9	31.2	42.3	28.8	38.3	10.7	27.6	15.8	36.8	21.7	31.3	20.4	28.2		14.7	38.2	35.1	55.2	27.6	48.6	31.3	48.3	6.2	32.6	19.5	41.2	19.1	39.4	16.4	37.7	19.6	46.6	32.5	56.8	32.6	57.7	28.2
S17	19	65.5	1.66	23.7698	0	0	50.5	12.625	25.25	35.5	49.5	40.8	52.9	43.2	55	39.2	51.8	20	44	29.9	38.2	27	41.7	27	45.3		38.5	55.9	45.4	62.9	47.3	65.1	37.8	55.1	13.2	45.4	29.9	50.4	30.3	51.9	35.7	39.9	28.8	59.7	55.2	75.2	37.3	75.3	56.9
S18	22	72.1	1.744	23.7051	2	1	47.5	11.875	23.75	36.6	56.1	42.9	56.3	38.1	50.6	32.3	45.4	12.9	48.2	26.5	42	24	38.1	18.9	34.1		37.1	64.7	50.6	68.6	39.1	61.7	34.5	56.1	9.4	40.3	25.6	49.9	23.2	42.4	22.1	39.2	14.2	59.7	37.7	53.5	48.3	74	38.6
S19	20	76.1	1.809	23.2545	4	0	55	13.75	27.5	47	72.3	44.5	67.9	44.6	64.7	39	65.1	24.3	59.3	31.1	56	29.2	53.3	30.6	51.9		47.4	74.2	40.8	64.9	39.1	62.8	38.1	62.2	13.2	61.9	31.2	57.6	29.8	55.9	28.7	51.7	19.9	76.3	41.7	77.5	46.4	79.8	37.1
S20	20	65.5	1.665	23.6272	0	0	47.3	11.825	23.65	31.5	59.3	41.8	58.8	40.5	55.3	39.4	55	20	51.4	28.2	53.4	27.6	50.8	27.4	48.9		23.2	56.3	40.9	60.7	34.7	60.9	40.5	57.8	8.1	46.9	25.7	54.9	27	52.8	26.4	48.3	17.9	52.2	38.4	67.2	44.6	72.8	40.4
S21	27	72.1	1.75	23.5429	8	3	55	13.75	27.5	19.1	61.8	39.5	39.4	19.9	54.3	32.4	61.1	10.4	50.2	19.3	34.3	12.8	31.5	20.5	50.7		28.1	62.2	33	60.8	36.3	62.3	33.7	57.9	10.5	50.9	23.6	51.6	22.7	51.9	23	48.3	19.7	66.4	34.6	68.2	47.9	71.6	45.6
S22	20	81.5	1.81	24.8771	0	17	54	13.5	27	55.9	82.7	59.2	83.5	48.3	81	52.5	74.9	27.6	76.2	44.6	71	36.6	61.9	41.9	60.9		55.3	81.6	56.9	83.3	48.1	78.5	47.7	71.4	19.2	73.1	38.2	72.4	39.5	68.4	40	60.2	38.3	91.4	74.1	100.7	70.2	91	63.3
S23	20	81.9	1.9	22.687	4	0	54.5	13.625	27.25	28.3	53	46.3	61.3	47.8	58.3	36.5	60.2	14.8	41.1	30.7	45.8	30.4	43.7	28.2	50.6		37.7	58.9	47.4	70.6	48.6	69	40.4	64.4	13.4	50.5	30	51.2	29.8	52.1	28.1	44.4	26.1	58.1	43.2	71.5	43	80.5	40.9
S24	20	63.5	1.72	21.4643	0	0	49	12.25	24.5	22.4	39.1	29.2	38.3	32	43.5	40.1	47	13.6	35.2	19.6	32.2	20.8	39	21.5	35.2		25.3	54.6	31.9	54.7	32.6	56	28.4	57.5	6.9	45.2	22	45.3	24.1	47.7	13.4	47.4	8.8	48.7	29.3	55.3	31.4	53.2	29.7
S25	25	63	1.8	19.4444	0	1	50.1	12.525	25.05	44.2	59.5	49	58.4	43.5	52.8	40.9	50.7	24.6	48.8	28.7	48.2	30.1	44.8	27	41.9		52.3	78.8	51.7	74.9	48.8	73.4	39.4	59.8	26.6	48.3	30.5	39.2	30.5	41.6	28.5	37.3	54.5	86.7	60.9	83	45.5	75	40
S26	23	74	1.75	24.1633	2	0	49.4	12.35	24.7	39.8	52.8	46.9	58.1	46	55.6	42.7	56.6	17.3	43.3	29.1	44.5	30.3	44.6	27.9	43.8		35.2	60.1	43.6	68.4	48.4	72.4	48.4	69.8	8.6	38.5	29.8	49.9	31.8	52.1	32.2	48.7	20.5	57.4	47.4	71.2	37.7	65	47.2
S27	23	72.1	1.8	22.2531	6	4	54.9	13.725	27.45	14.2	42.6	31.1	41.5	43.4	52.9	38	48.7	5.9	34.7	19.2	33.3	22.3	36.5	21.7	43.8		13.4	37.9	31.8	51.7	32.5	56	28.5	56.8	5.5	24.6	14.1	28.4	17	32.8	21.1	47.9	17.2	62.1	34	69.9	35.8	69	32.4
S28	26	72	1.7	24.9135	6	0	47.5	11.875	23.75	41.5	59	43.3	55.3	47.6	62.6	44.2	65.9	19	45.4	31.8	27.1	34.3	56.7	34.7	52.5		23.2	55.2	42.9	63.8	39	74.4	46.2	63.1	10.2	41.2	26.7	51.1	31.2	61.2	33	50.4	12.8	50.4	32.6	66.4	38.8	73.3	38.2
S29	19	61.5	1.647	22.6719	16	7	50.5	12.625	25.25	24.1	48.4	38.8	58.6	42.2	49.9	38.1	52.5	11.1	33.7	21.9	39.1	29.5	34.1	26.9	45.5		35.4	65.2	43.9	65.2	43	68.7	37.5	66	11.6	43.1	30.1	42.6	30.6	49.9	29.7	32.8	5	55.4	37.3	61.8	43.2	79.9	45.4
S30	19	63.6	1.6	24.8437	10	1	49.2	12.3	24.6	21.2	35.9	29.3	38.2	30	37.4	30.1	39	11.6	26.6	14.9	29.4	16.1	26.6	45.9	27.2		17.3	44.1	33.1	57.6	32.9	59.7	32.7	49.5	8.6	29.6	18	29.6	17.9	38.3	17.4	30.3	21.4	47.6	26.4	46.7	33.3	52.4	37
S31	22	62.6	1.63	23.5613	4	14	47.5	11.875	23.75	26.2	40.9	30.9	40.3	32.3	42.3	24.8	36.1	10.2	34.2	20.4	32	19.7	35.6	18.8	29.6		19.3	52.1	36.6	54.8	30.1	47.1	31.9	47	6.1	37.2	19.3	41.2	19.7	37.8	20.6	36.2	22.1	53.4	26.9	57.8	28.6	52.4	31.9
S32	21	79.4	1.85	23.1994	4	0	56.6	14.15	28.3	40.1	56	38.2	53.6	33.9	47.5	28.6	42.9	25.8	50.8	28	48.6	25.3	43	23.2	37.2		41.3	69.4	49	68	35.8	66.6	45.2	63.8	24.4	57.7	29.4	57.4	28.3	56.2	28.3	47.6	44.2	75.2	48.6	78.8	50.2	83.1	34.6
S33	21	73.4	1.79	22.9081	4	0	57.2	14.3	28.6	29.6	66.7	38.6	60.1	37.5	60.1	45.1	64.6	14.6	49.6	31	52.2	27.4	52	32.6	56.9		9.2	48.9	35.2	64.2	46.7	67.2	46.3	67	2.4	35.8	23.7	56.9	31	57.1	29.6	49.9	17.3	56.5	30.7	66.3	38	73.4	45.4
S34	22	66.4	1.76	21.436	0	5	52.7	13.175	26.35	36.7	60	51.4	61.1	44.9	57	43.3	55.2	8.2	55.3	33.7	55.2	32.3	49.6	30.5	50.3		36.8	60.8	46.1	72	46	67.9	44.4	67.3	8.9	46.5	27	57.2	31.3	52.8	29.1	42.1	12.1	46.5	41.3	78.3	38.7	75.6	41.2
S35	24	59.7	1.66	21.665	0	0	45.2	11.3	22.6	45.3	59.4	45.1	54.4	43.9	50.6	38.2	49.1	19.1	53.6	29	50.6	27.4	47.1	25.4	44.6		30.4	60	37.3	64.4	35.2	63.4	42.1	60.7	12.8	53.6	26.1	54.7	25.7	51.4	24.9	46.6	41.8	65.1	49.8	75.9	50.7	74.2	50.2
S36	20	75	1.805	23.0201	6	17	54.5	13.625	27.25	50.8	23.3	50.4	26.9	48.4	26.8	51.4		35.1	70.1								25.3	64.2	34.4	68.9	37.3	66.5	37.5	69.7	6.1	47.8	24.1	51.4	25.1	53.4	27.7	53.9	8.6	64.1	36	71.2	33.7	76.7	34.5
S37	19	69.6	1.817	21.0814	4	0	52.2	13.05	26.1	38.5	21.2	23	23.7	17.6	23	16.4		36.1	45.4								12.9	31.1	34.5	40.8	31.9	46.5	26.5	45.3	4.3	26.7	16.3	25.9	17.6	23.8	16.4	29.7	9.9	39.2	20.3	40.2	32.6	46	34
[truncated: 59 more columns]

## Sheet: RETEST
	V 0,15m/s R 0,25%																V 0,30m/s R 0,25%																V 0,45m/s R 0,25%																V 0,15m/s R 0,50%
	Fpeak Rep1		Fpeak Rep2		Fpeak Rep3		Fpeak Rep4		FMean Rep1		FMean Rep2		FMean Rep3		FMean Rep4		Fpeak Rep1		Fpeak Rep2		Fpeak Rep3		Fpeak Rep4		FMean Rep1		FMean Rep2		FMean Rep3		FMean Rep4		Fpeak Rep1		Fpeak Rep2		Fpeak Rep3		Fpeak Rep4		FMean Rep1		FMean Rep2		FMean Rep3		FMean Rep4		Fpeak Rep1
SUBJECT	Con	Exx	Con	Exx	Con	Exx	Con	Exx	Con	Exx	Con	Exx	Con	Exx	Con	Exx	Con	Exx	Con	Exx	Con	Exx	Con	Exx	Con	Exx	Con	Exx	Con	Exx	Con	Exx	Con	Exx	Con	Exx	Con	Exx	Con	Exx	Con	Exx	Con	Exx	Con	Exx	Con	Exx	Con
S01	32.3	48.3	39.5	46.7	36	49.1	33.8	49.1	17.8	44	25.4	41.1	23.8	39.8	23.9	40.2	26.1	49.2	32.3	50.4	30.6	49	31.2	49	16	43.4	23.6	39.8	22.7	43.5	22.3	42.8	24	53.6	46	63	45.9	61.7	41	61.3	14.1	43.8	23.1	48.5	23.2	48.2	22.8	45.8	29.4
S02	32.4	62.6	48.1	59.3	40.1	57.7	42.2	63.8	22.1	55.5	33.2	53	32.3	50.6	32	55.9	40.3	71.7	47.8	69.1	50.2	70.2	50	72.5	17	59.8	33.2	59.7	32.8	62.8	33.2	61.4	29	70.7	41.9	70.2	45.8	72.7	44.7	78	7.3	58.4	30.7	60.8	31.1	60.5	31.3	58.8	32.8
S03	42.3	55.7	46.2	53.2	41.3	54.3	43	55.6	12.4	48.8	30.6	39.9	27.4	40.6	18.5	38	24.9	54.3	38.5	56.5	36.6	65.1	38.2	59.4	7.8	44.8	25.9	45.2	26.3	43.8	23.1	41.5	16.1	55	41.9	78.3	41.4	75.2	45.4	75.7	3.7	41.2	25.4	54.7	25.3	54.2	25.4	51.3	36.6
S04	43.2	62.8	46.2	64.1	45	64	45.2	60	29.2	57.6	32.2	57.7	31.2	57.4	30.8	53.9	37.6	62.4	36.6	59.4	37.2	59.2	35.4	58.4	26	52.7	26.7	53.1	27.1	52.4	26.5	50.6	3.2	86.1	34.5	71.3	40.4	73.1	36.2	70.8	1.5	38.3	24.4	55.5	25.1	54.4	24.4	49	40.7
S05	32.7	44.4	28	48	28.4	48.6	26.1	42.2	16.6	40.7	18.6	41	19.6	38.8	18.5	37.8	24	52.6	28.5	50.1	31.2	48.6	19.6	20.4	6.6	44.1	18.8	42	20.1	41	8.7	10.6	26.4	59.3	34.1	58.7	31.3	60.4	29.9	59.9	9.8	49.1	18.5	43.6	19.1	42.5	19.9	36.3	30.7
S06	39.9	69.7	46.3	66.9	44.6	61.2	39.3	58	27.6	62.7	36.1	60.7	34.7	54.5	31.4	49.7	54.8	77	53.3	71.8	42.8	69.6	40.8	65.9	22.3	67.5	35.4	61.7	33.5	62.5	32.9	57	39	77.5	55.8	81	50.7	83	51.3	79.7	14.9	66.8	32.2	69.3	31.8	68.8	31	63.2	38.5
S07	39.2	51.3	36.5	49.8	37.3	48.2	34.8	47	21.3	47.6	23.8	45.5	23.1	44.3	22.1	41.9	35.8	55.2	35.9	58.6	32.2	56.2	38.7	54.4	17.4	48.7	20.9	47.9	21.5	46.2	21.3	43.6	30	52.2	31.8	58.3	28.4	58.9	31.8	59.4	10.8	45.7	20.1	47.3	19	46.3	18.7	43.8	28.8
S08	38.8	51.5	34.1	49.6	34.3	44.8	38.3	46.6	25.2	46.8	24.6	42.7	23.2	39.1	24.2	41.7	40.3	59	34.8	56.1	36.2	56.9	37	55.7	20.9	47.1	23.9	46.9	23.7	46.4	22	44.6	38.5	63.1	32.7	66.6	35.9	66.8	40.6	64.7	13.3	46	21	49.9	21.8	49.1	21.5	46.3	40.3
S09	34.8	65.8	44.6	64.1	45.7	64.7	42	64.4	25.4	28.5	33.7	57.8	32.2	57	31.3	56.1	34.7	66.3	41.4	68.9	37.2	67.6	40.7	66.7	14.7	56.2	30.3	60.1	29.9	59.1	31.1	52	31.7	69.9	45.3	76	51.9	78.9	37.5	72.4	22.6	60.8	29.5	64	29.7	60.3	28.7	60	35.3
S10	39.8	62.8	38.5	47.7	44.8	58.7	43.3	59	16.9	55.9	26.1	40.8	26.7	51.9	29.7	52.6	32.6	59.3	44.7	64.1	36.2	53.7	30.4	54.9	17.8	51.3	29	56	24.1	45.6	23.3	45.3	31.6	63	58.3	87.3	42.2	79.5	49.7	84.9	6.6	52.2	30.4	63.6	29.1	58.5	29.5	54.8	28.8
S11	36.3	56	38.2	51.8	38	51	39	50.6	18.5	48.9	28.3	44.8	25.8	41.8	24.9	43.1	21	52.3	28.8	50.4	31.5	52.3	36.2	53.8	10.5	39.7	18.7	43.2	19	42.7	20.9	44.2	39.7	72.5	35.9	73.1	50.2	82.3	33.3	72.3	16.2	55.4	23.9	55.7	25.5	58.7	22.2	50.2	35.5
S12	48.8	64.9	44	61.4	45.2	59.5	43.8	52.6	26.6	60.3	32.8	57.2	34.4	51.8	31.6	43.6	43.3	70.3	46.1	78.1	53.8	74.5	52.4	72	7.9	61.4	33.8	60.2	34.4	59	34	53.9	50	79.8	57.7	79.5	48.3	79	38.7	74.4	14.9	61.2	28.8	59.7	29.3	59.3	27.7	54.7	42.5
S13	29.9	53.5	31.3	49.6	30.5	49.2	33.9	47.3	19.1	50.3	26.2	46	24.1	46.8	22.1	43.5	33.9	53.3	43.5	62	42	58.2	41	59.6	16.4	47.5	25	50.2	24.7	50.5	24.3	46.7	40.2	73.5	52.1	75.9	39.6	73.9	47.1	72.7	16.8	56.3	27.1	57.1	25.1	55.1	24.4	52.1	40.4
S14	41.7	50.9	38.8	53.1	36.1	48	35.2	44.6	13.7	41.7	25.1	44.9	24.2	37.1	22.8	37	32.5	56	37.1	60.1	35.2	54.4	41.1	54.4	7.5	39.6	22.1	41.7	24.1	45	20.4	39.9	45.5	67.8	35.8	62.3	36.3	64.5	31.6	64.7	12.6	41.5	22.8	39.4	21.7	50.5	19	46.5	40.8
S15	47	61.4	51	62.6	42.1	58.3	42.1	59.5	21	57.8	32.4	59.2	31.7	54.2	29.3	51.1	36.6	63.5	48.9	71.1	41	69	46.6	66.1	11	55.5	31.2	60.5	30.2	58.3	30.4	53.9	40.3	70.4	36.2	70.9	45.5	71	42.5	66.4	11.7	53.7	27.1	60.4	28.1	61	27.7	54.3	30.6
S16	21.4	42.8	29.5	44.3	25	42.1	25	41.6	10	38.3	21.6	40	17.7	34.6	18	35.9	19.9	42.5	31.3	49.7	27.4	47.8	26.5	46.5	5.8	34.9	19.1	41.4	18.2	41	18.4	38.6	20.9	50.2	35.2	55.3	21.6	53.9	32	52.4	4.3	41.8	20.1	45.6	15.8	42.1	17.2	41.6	19.3
S17	41.9	60.1	47.6	62.7	39.2	51.4	35.6	45.8	22.3	53.7	33	50.9	28.1	42.5	24.8	37.9	42.9	63.6	40.9	69.6	38.6	58.8	46.3	64.4	19.9	53.7	32.4	57.1	30.9	49.6	27.4	51.1	48	76.1	42.2	65.9	54.9	86.6	50.7	82.8	21.2	48	29.6	53.3	31.6	63.6	30.4	53.4	39.6
S18	31.5	56.9	35	42	37.3	48.8	32.7	44.5	16.4	50.4	26.7	33.9	25	32.3	21.9	37.5	33	53.6	43.9	61.8	40.2	57.4	35.4	56.6	10	46.4	26.8	50.2	26.2	47.9	19.6	42.1	18.4	60.8	35.4	62.5	38.7	67.7	34.8	62.3	6.1	49.1	25.4	54.5	27.6	41	16.8	49.3	31
S19	51.7	66.3	50.2	65.3	47.3	60.6	44.7	60.7	20.1	57.5	31.7	50.8	30.7	40.7	31.7	47.7	37.8	64.6	39.1	68.2	40.2	66.2	47.7	66	11.4	49.9	28.1	51.1	29.1	52.4	28.5	44.4	25.7	75.5	56.2	86.7	58	85.6	56.1	77.8	6.4	56.3	28.9	63.3	27.5	55.8	28	50.3	37.1
S20	48.4	63.9	43.5	58.2	46.5	56.7	43.4	53.4	23.2	58.4	29.7	54.1	29.7	50.5	28.5	43.8	41.3	65.1	41.3	62.8	44.4	63.3	42.5	62.4	19	54.9	27.4	54.2	27.3	52.7	26.6	50.7	36.3	70.5	53.1	80.6	51.1	76.4	52.9	75.6	14.9	55.2	27.3	58.9	28	57.2	28.1	54.2	40.2
S21	32.9	54.3	29.8	44.6	36	55	34.8	54.4	18.5	47.3	22.9	36.9	25.2	43	23.9	47.6	28.6	61.2	36.5	58.2	36.1	63	33.4	54.2	13.4	47.4	24.6	43.7	23.5	44.3	24.8	41.7	17.4	56.7	34.4	64.2	30.4	64.6	34.2	63.5	6.2	43.9	19.2	53.5	21.6	46.4	21	45.8	19.6
S22	44.2	76.3	49.4	79	45.3	77.4	47.7	74.5	25	70.7	40.2	66.8	36.3	66.3	35.6	60.8	48.1	81.7	47.9	85.5	55.2	87.2	59.8	81.2	19.4	71.3	39.5	71.4	42.2	75.4	41.6	69.5	25.7	85	49.9	93.3	61.6	89.3	58.3	86.9	8.6	68	36.8	79.5	36.3	75.6	37.5	69.2	49.2
S23	42.9	60.2	41.7	57.2	40.8	56.7	38.4	50.7	14.9	52.4	30.8	49.7	28	44	27.7	44.1	37.2	60.8	46	71.7	41	67.9	42.1	68.7	11.5	50.2	27.3	55.3	28.5	53.9	27.7	52.9	31.7	67	38.4	77.3	37.7	79.1	42.2	82.9	8.7	52.8	28.1	63	27.7	63.2	27.7	59.2	39.3
S24	36.4	51.7	41.8	53.8	36.1	46.9	34.3	43.2	12.6	47.2	29.3	45.9	28.1	41.7	26.7	39.2	35.3	61.4	38.2	61	34.5	62.4	32.3	57.2	10	53.2	26.9	53.9	26.8	53	22.6	50.2	5.2	64.4	33.3	64.6	35.2	68	35.5	63.3	1.9	31.6	14.7	56.2	26.4	57.3	24.4	50.8	33
S25	45.2	56.4	42.7	59.7	42.5	54.3	45.8	54.3	25.2	52.2	30.6	52	28.4	48.9	27.7	44.9	49.2	79.6	48.6	67.7	51.6	74.2	40.3	68.4	27.4	58.6	33.1	49.9	31.3	47.5	29.9	37.1	34.8	82.8	53.7	74.5	48.9	73.8	57.4	76.8	25.3	59.2	30.9	53.7	28.8	53.1	28.9	49.4	36.2
S26	32.8	56.5	51.3	62.9	47.1	59.5	47.5	59	12.1	36.8	29.6	50.9	31	53.4	29.9	49.6	43.8	65	40.7	69	43.8	59.8	49.5	61.8	14.9	50.8	26	52.1	28.4	44.6	28.7	45.5	49.4	80.2	35.3	67.8	35.5	64.6	46.3	70.4	15.6	55.9	25.7	56.7	24.6	51.2	25.9	54.2	39.2
S27	27.8	49.7	32.1	43.1	27.3	40.8	29	39.2	8.9	42.2	20.9	34.9	18.5	34.1	19.1	31.6	15.4	53.5	35	53.2	28.5	49.2	25.8	47.6	4.8	41	20.7	45.2	21.2	41.9	18.8	37.2	17.3	60.3	40.7	66	45.9	63.2	37.6	62.6	5.3	46.6	24.2	50.2	23.3	43.1	24.5	43	23.1
S28	34.5	60.8	41.4	61.7	44.4	67.1	41.7	61.2	16.7	54.7	32.3	54.8	33.4	58.3	33.1	53.9	27	62.9	48.8	69.3	49.2	72	44.8	69.2	7.8	51.3	31.3	61.4	31.1	61.6	35	60.1	23	58.9	38.3	73.1	46.1	76.6	62.7	80.9	6.2	43.1	25.1	65.2	33.5	61.9	33.8	61.8	31
S29	18.3	35.1	37.7	50.8	40.9	51.6	39.7	51.7	7.3	31.2	24.4	41.8	23.5	40	24.4	42.9	23.5	44.3	40.1	52.2	40	51.8	39.9	54.3	8.1	32.3	19.7	34.7	25.6	36.7	25	33.2	5.1	36.8	33.9	56.4	44.4	68.2	47.6	68.9	1.7	17.6	11.4	39.8	22.5	46.9	22.8	45	26.2
S30	36.4	49.2	34.6	45.9	31.7	46.1	38.3	45.4	19	43.6	24.5	41	24.7	42.4	22.8	39.1	30.7	56.6	31.9	55.9	40.4	56.7	34.4	55.7	11.7	41.6	20.8	41	21.9	44.2	20.7	34	20.6	54.9	31	57.8	32.9	60.6	30.5	62.1	7.1	37	19.3	45.6	19	40.8	19.4	39.8	37.9
S31	23.1	32.2	34.4	44.5	27.1	36.7	30.3	37.1	10.5	19.2	20.5	38	19.7	29.1	18.9	29.9	17.1	41.1	25	44.9	28.9	48.5	29.2	48.2	6.8	31.9	18.1	34.2	20.9	41.9	20.2	41	9.6	44.7	30	62.2	28.4	68.4	26	58	3.3	32.3	19.3	45.5	20.1	46.6	17.7	41.6	27.4
S32	41.6	62.6	43.9	60.7	38.2	52.1	36.4	49.9	20.7	56.6	28.9	56	28.7	47.9	25.9	44.4	41.3	69.5	38.6	67.3	37.7	61.1	41.2	63.7	9.9	58.3	29.2	57	26	53.5	24.9	52.4	51.8	75.2	40	80.3	55	87	44	82.8	14.4	61.3	28.3	63.9	29.2	64.3	26.5	62.1	30.7
S33	34.3	70.9	51.3	65.2	42.5	62.9	49.5	66.1	15.4	57.5	33.7	60.7	29.5	55.9	33.5	55.1	27.8	64.6	48.5	72.9	46.3	71.1	42.3	70.4	9	53.2	33.3	65.1	35.3	63.7	33.8	53.5	26.5	66.7	39.3	75.2	46.3	80.3	52.3	82.1	8.1	52.7	26	63.8	29.7	66.7	31.3	65	27.3
S34	42.9	58.1	45.3	59	46.2	57.2	44.3	56.5	17.5	52.3	32.5	51.2	31.1	49.7	31.3	51.9	34.8	65.4	49	67.3	41.9	64.6	42.4	62.5	10.9	57.1	31.9	60.2	31.9	53.2	30.5	49.9	4.9	53.1	33.2	65.7	40.2	72.5	37.1	68.4	1.6	25.4	15.9	56.7	28	57.6	28.1	52	37.9
S35	43.7	60.2	42.7	55.9	37.1	50.3	36.9	49.3	20.9	52.9	28.1	49.6	26.4	47.4	24.7	43.8	34.6	56.2	42.6	63.6	44.4	61.6	42.2	61.1	10.7	49.6	24.5	51.4	24.9	50.6	24.1	45.9	34.6	64.3	40.4	69.9	39.9	68.7	31.3	65.5	9.6	50.7	21.9	51.8	21.5	50.5	20.2	46.6	38.8
S36	23.6	55.9	35	58.2	35.8	55.1	40.9	67.7	7.4	49.6	26.5	51.8	26.6	49.1	28.4	56.1	27.2	58.5	35.1	64.3	40	61.4	43.7	66.1	5.3	48.3	24.8	55.3	26.6	50.9	26.9	54.2	4.7	64.8	30.1	71.6	45.4	72.4	42.6	67.1	1.9	34.4	20.5	56	24.9	59.1	26.2	50.7	24.4
S37	27.7	51.2	37.5	50.6	38.7	52.4	38.3	49.3	13.2	46.3	25	34.2	24.4	35.9	24.7	27	39.2	64.8	39.1	60.7	37.2	49.8	37.1	50.1	25.8	52.2	28.2	53.4	27.8	28.1	28.7	32.2	30.4	60.9	34.5	58.6	35.6	64.9	32.4	66.8	7.9	44.3	22.9	43.2	23.6	43.2	18.4	38	35.6
[truncated: 49 more columns]
